*Research paper*

# **Genome-wide identification and transcriptomic analysis of microRNAs across various amphioxus organs using deep sequencing**

*Qi-Lin Zhang<sup>2, †, \*</sup>, Hong Wang<sup>1, †</sup>, Qian-Hua Zhu<sup>3, †</sup>, Xiao-Xue Wang<sup>1, †</sup>, Yi-Min Li<sup>1</sup>, Jun-Yuan Chen<sup>4</sup>, Hideaki Morikawa<sup>5</sup>, Lin-Feng Yang<sup>3, \*</sup>, Yu-Jun Wang<sup>1, \*</sup>*

<sup>1</sup> *Guangxi Key Laboratory of Beibu Gulf Marine Biodiversity Conservation, Ocean College, Beibu Gulf University, Qinzhou 535011, China*

<sup>2</sup> *Faculty of Life Science and Technology, Kunming University of Science and Technology, Kunming 650500, China;*

<sup>3</sup> *BGI Genomics, BGI-Shenzhen, Shenzhen 518083, China*

<sup>4</sup> *Evo-devo Institute, School of Life Sciences, Nanjing University, Nanjing 210023, China;*

<sup>5</sup> *Faculty of Textile Science and Technology, Shinshu University, Ueda, Nagano 386-8567, Japan*

**Running title:** Transcriptomic analysis of microRNAs across various amphioxus organs

†These authors contributed equally.

\*Correspondence: wangxiaochen528@hotmail.com (Y.J.W) or

zhangqilin88888@126.com (Q.L.Z) or yanglinfeng@bgi.com (L.F.Y)

## 1 **ABSTRACT**

2 Amphioxus is the closest living invertebrate proxy of the vertebrate ancestor.  
3 Systematic gene identification and expression profile analysis of amphioxus organs is  
4 thus important for clarifying the molecular mechanisms of organ function formation  
5 and further understanding the evolutionary origin of organs and genes in vertebrates.  
6 The precise regulation of microRNAs (miRNAs) is crucial for the functional  
7 specification and differentiation of organs. In particular, those miRNAs that are  
8 expressed specifically in organs (OSMs) play key roles in organ identity,  
9 differentiation, and function. In this study, the genome-wide miRNA transcriptome  
10 was analyzed in eight organs of adult amphioxus *Branchiostoma belcheri* using deep  
11 sequencing. A total of 167 known miRNAs and 23 novel miRNAs (named novel\_mir),  
12 including 139 conserved miRNAs, were discovered, and 79 of these were identified as  
13 OSMs. Additionally, analyses of the expression patterns of eight randomly selected  
14 known miRNAs demonstrated the accuracy of the miRNA deep sequencing that was  
15 used in this study. Furthermore, potentially OSM-regulated genes were predicted for  
16 each organ type. Functional enrichment of these predicted targets, as well as further  
17 functional analyses of known OSMs, was conducted. We found that the OSMs were  
18 potentially to be involved in organ specific functions, such as epidermis development,  
19 gonad development, muscle cell development, proteolysis, lipid metabolism and  
20 generation of neurons. Moreover, OSMs with non-organ specific functions were  
21 detected, and primarily include those related to innate immunity and response to  
22 stimuli. These findings provide insights into the regulatory roles of OSMs in various

23 amphioxus organs.

24

25 **Keywords: *Branchiostoma belcheri*; Organ transcriptomics; MicroRNAs; Deep**  
26 **sequencing; qRT-PCR**

27

## 28 **INTRODUCTION**

29 The phylum Chordata contains three subphyla members, including the  
30 Cephalochordata (e.g. amphioxus), Urochorda (e.g. ciona), and Vertebrata (Satoh *et*  
31 *al.*, 2014). The origin and evolution of organs and tissues in chordates is one of the  
32 most important scientific questions in evolutionary developmental biology (evo-devo)  
33 (Holland and Chen, 2001). However, with the exception of a recent report by  
34 Marlétaz *et al.* (2018), genetic information from different organs of amphioxus as the  
35 sister lineage to all other chordates remain largely unstudied, which limits our  
36 understanding for molecular mechanisms of organ function formation in chordate as a  
37 vertebrate outgroup and origin of organ complexity in vertebrates. Amphioxus, also  
38 known as lancelets, which belong to the subphylum Cephalochordate, retains some of  
39 the structural morphology characteristics observed in common ancestors between  
40 cephalochordates and vertebrates from the Cambrian period of ~530 million years ago  
41 (Chen *et al.*, 1999; Putnam *et al.*, 2008). Therefore, cephalochordates are key  
42 experimental animals for the study of evo-devo, evolutionary origins of organs, and  
43 comparative immunology of vertebrates (Putnam *et al.*, 2008; Huang *et al.*, 2014).

44 Non-coding RNAs (ncRNAs) regulate many biological processes, such as

45 development, apoptosis, metabolism, differentiation, and the function formation of  
46 cells in animals (Arner and Kulyté, 2015). Of the ncRNAs, those known as  
47 microRNA (miRNA, ~22 nucleotides) are the most extensively investigated types. In  
48 general, many of these miRNAs are transcribed from introns of protein-coding genes,  
49 and negatively regulate expression of their targets by complementary base-pairing to  
50 regions in the 3' UTR (untranslated regions) of mRNAs in animals (Campo-Paysaa *et*  
51 *al.*, 2011). Furthermore, miRNAs may contribute to the function formation of  
52 different organs through their specific expression in amphioxus. It has been reported  
53 that miR-92 is specifically expressed in the hepatic caecum, gill, and intestines in  
54 amphioxus. It is believed to regulate the complement pathway by targeting C3 to  
55 promote the immune response against bacterial infection (Yang *et al.*, 2013).  
56 Muscle-specific expression of miR-1 and miR-133 was clearly demonstrated using *in*  
57 *situ* hybridization using in amphioxus early larvae (Campo-Paysaa *et al.*, 2011).  
58 Candiani *et al.* (2011) identified six miRNAs with specific expression in the nervous  
59 system of amphioxus by whole-mount *in situ* hybridization. Both differentiating and  
60 mature neurons exhibited specific expression of miR-124. Thus, the body of literature  
61 suggests that miRNAs may be key regulatory molecules for the regional and specific  
62 function formation of different organs in amphioxus. So far, only miRNA expression  
63 profiles in three digestive and immune-related organs, gill, intestine and hepatic  
64 caecum, have been obtained using microarray technology based on nucleic acid  
65 hybridization (Liao *et al.*, 2017a). However, only three organ types were used and  
66 microarray based on non-sequencing technology is not feasible for the identification

67 of novel molecules in different organs (Gao *et al.*, 2011), possibly hindering a  
68 systematic and accurate discovery and function analysis of organ-specific expressed  
69 genes.

70 Next-generation sequencing is a useful tool for the analysis of the expression  
71 profile of miRNAs. Its advantages are unbiased large-scale detection of small RNAs  
72 at a genome-wide level, even for transcripts with low expression levels, and its ability  
73 to identify novel RNA miRNAs (Yao *et al.*, 2012). To date, there has not been a  
74 comparative analysis of miRNA expression profiles among different organs in  
75 amphioxus using deep sequencing. In this study, deep sequencing was used to  
76 systematically analyze miRNAs purified from eight organs of adult Chinese  
77 amphioxus (*Branchiostoma belcheri*). In addition to demonstrate organ-specific  
78 expression of a large group of known miRNAs and novel miRNA candidates among  
79 different organs, the corresponding target genes of these miRNAs were predicted, and  
80 the function of known organ-specific expressed miRNAs was explored. Then, the  
81 function of all organ-specific expressed miRNAs (OSMs) was analyzed by  
82 enrichment of Gene Ontology (GO) terms using bioinformatics. The dataset obtained  
83 here will be a valuable resource for uncovering the potential roles of miRNAs in  
84 organ differentiation of amphioxus.

85

## 86 **MATERIALS AND METHODS**

### 87 **Ethics statement**

88 This study was carried out in accordance with the recommendations of the Guide for

89 the Care and Use of Laboratory Invertebrate Animals. The protocol was approved by  
90 the Ethical Committee of Researches of the Nanjing University.

91

## 92 **Sample preparation**

93 Healthy adult individuals of *B. belcheri* were obtained from the Evo-devo Institute of  
94 Nanjing University at Beihai City, Guangxi Province, China. Experimental animals  
95 were kept in acrylic tanks with filtered seawater, following our previously used  
96 methods (Liao *et al.*, 2017b). These individuals were maintained for several days to  
97 empty their intestinal and hepatic caecum contents. Subsequently, each of the  
98 approximately 40 individuals was placed on ice and dissected to collect the eight  
99 specific organs (i.e. nerve cord, notochord, skin, intestine, hepatic caecum, muscle,  
100 gill and ovary) used in this study. Each organ type obtained from different individuals  
101 was pooled together in a 1.5 ml RNase-free microcentrifuge tube, and immediately  
102 frozen using liquid nitrogen and stored at  $-80^{\circ}\text{C}$ . All experimental samples were  
103 stored at Beihai Marine Station of Nanjing University in Beihai, Guangxi province,  
104 China.

105 Paraffin section of *B. belcheri* was generated according to previous methods  
106 (Yang *et al.*, 2013). In brief, adult *B. belcheri* was fixed in 4% paraformaldehyde at 4  
107  $^{\circ}\text{C}$  for 12 hours, dehydrated with graduated ethanol, and embedded in paraffin. Then,  
108 the embedded amphioxus was cut into 10  $\mu\text{m}$  sections. After deparaffinization, organ  
109 sections were dyed using Hematoxylin and Eosin Staining Kit (Yeasen, USA)  
110 following the manufacture's manual. Next, the dyed sections were photographed by

111 Olympus microscope DP71 (Olympus, Japan).

112

### 113 **RNA extraction, library construction, and sequencing**

114 The total RNA of each organs type was extracted using Trizol reagent (Invitrogen,  
115 USA), according to the manufacturer's protocol. Residual DNA contamination was  
116 removed by RNase-free DNase (Qiagen, Germany). RNA concentration and quality  
117 were initially assessed using a BioPhotometer Plus (Eppendorf, Germany). Next, an  
118 Agilent 2100 Bioanalyzer (Agilent Technologies, USA) was employed to further  
119 verify RNA structural integrity and quality. RNA samples with a RNA integrity  
120 number (RIN value)  $\geq 7$  were used in further experiments. Preparation of small-RNA  
121 libraries was performed using Illumina TruSeq Small RNA Library Preparation Kits  
122 (Illumina, USA). Quality of the small-RNA library was assessed using the Agilent  
123 2100 Bioanalyzer (Agilent Technologies, USA) and an ABI StepOnePlus Real-Time  
124 PCR System (Applied Biosystems, USA). Deep sequencing of the eight prepared  
125 libraries was performed on an Illumina HiSeq4000 platform (Illumina, USA) with  
126 50-bp single-end reads at the Beijing Genomics Institute (BGI-Shenzhen, China).

127

### 128 **Analysis of deep sequencing data**

129 Clean reads were obtained from the raw data by removing low-quality tags, reads with  
130 poly-N tails or 5' adapter contaminants, reads with 3' null adapters, and insert null  
131 tags. Next, clean small RNA (sRNA) tags were mapped to the *B. belcheri* genome  
132 (v18h27.r3; <http://genome.bucm.edu.cn/lancelet/>, early available) using Bowtie2

133 (parameter: -q -L 16 --phred64 -p 6) to analyze their expression and distribution  
134 across the reference genome (Langmead *et al.*, 2009). To discard tags originating from  
135 rRNAs, tRNAs, snRNAs, snoRNAs, and sRNA tags, a BLAST search was conducted  
136 against the Rfam 11.0 and the NCBI GenBank databases. RepeatMasker software and  
137 genome-based mapping information were used to remove tags from repeat regions  
138 and protein coding sequences (Zhong *et al.*, 2015). The sRNA sequences were  
139 identified by performing a BLAST search in miRBase21.0 (Griffiths-Jones, 2006),  
140 allowing a maximum of two mismatches to known miRNA.

141

#### 142 **Identification of novel miRNAs and homologous miRNAs**

143 The remaining sRNA tags originating from exon sense and intron and intergenic  
144 regions were used to identify novel miRNAs and their precursors. The prediction  
145 software mirDeep2 was used to identify novel miRNAs using default options  
146 recommended by software manual (Friedländer *et al.*, 2012). MirDeep2 has a  
147 substantially improved algorithm for the identification of miRNAs from RNA  
148 sequencing data of animal groups and can predict canonical and non-canonical  
149 miRNAs with an accuracy of 98.6-99.9% (Friedländer *et al.*, 2008; Friedländer *et al.*,  
150 2012). To ensure the accurate discovery of novel miRNAs through verification of the  
151 secondary structures, novel miRNA precursors (pre-miRNAs) were analyzed using  
152 RNAfold (Höner *et al.*, 2011) to estimate whether the secondary structure of the  
153 precursor is a perfect stem-loop formation. Furthermore, the predicted novel miRNA  
154 tags/sequences with mapped tags of less than 5 were discarded (Zhang *et al.*, 2017a),



155 and the remainder retained as the novel mirDeep2 miRNAs. Meanwhile, the  
156 additional prediction software Mireap (Yuan *et al.*, 2013) was used to discover novel  
157 miRNAs by predicting the hairpin structure, dicer cleavage site and minimum free  
158 energy of the unannotated small RNA tags that had been mapped to the genome.  
159 Those tags with a minimum free energy (MFE) value of the folding precursor  $\leq -19$   
160 kcal/mol were kept as novel miRNAs identified by Mireap. The intersection of  
161 identified miRNAs by mirDeep2 and Mireap was retained. Then, these identified  
162 miRNAs were further filtered as the final novel miRNA set under strict criteria  
163 (Huang *et al.*, 2017): 1) the presence of both 5p and 3p strands in the read dataset; 2)  
164 their overlap with a  $\sim 2$  nt overhang on each side when the hairpin is folded.  
165 Subsequently, novel miRNAs and *B. belcheri* known miRNAs above annotated were  
166 searched in miRBase21.0 animal database (excluding *B. belcheri* dataset), allowing  
167 for a maximum of two mismatches and those that were annotated as known miRNAs  
168 of other animals were considered to be conserved/homologous.

169

## 170 **Normalization of miRNAs expression and identification of organ-specific** 171 **miRNAs**

172 Expression levels of all miRNAs (conserved and novel miRNAs) were normalized  
173 using TPM values (Zhong *et al.*, 2015). To estimate the organ specificity of a miRNA,  
174 an entropy-based metric that relies on Jensen-Shannon (JS) divergence was employed  
175 to calculate specificity scores (ranging from 0 to 1) based on previous descriptions of  
176 the JS algorithm (Cabili *et al.*, 2011). This specificity metric quantifies the similarity

177 between a transcript's expression pattern across tissues and another predefined pattern  
178 that represents the extreme case in which a transcript is expressed only in one tissue.  
179 Therefore, a perfect organ-specific expression pattern is scored as JS = 1, indicating a  
180 transcript is expressed only in one organ type (Cabili *et al.*, 2011). Specifically, index  
181  $\tau$  was calculated according to previously published methods using a custom Perl script  
182 to detect the organ specificity of miRNA expression (Yanai *et al.*, 2005). For a given  
183 transcript, the index  $\tau$  is defined as  $\tau = \sum_{i=1}^N (1 - x_i) / N - 1$ , where  $N$  is the number of  
184 organs, and  $x_i$  is the expression value in the  $i^{\text{th}}$  organ normalized by the maximal  
185 expression value across all of the organs (Li *et al.*, 2015). First, it was determined  
186 whether expression was organ-specific for each miRNA. If miRNAs were observed to  
187 have values for  $\tau > 0.85$ , they were considered to be expressed in an organ-specific  
188 manner (organ-specific miRNAs, OSMs) (Cabili *et al.*, 2011). Next, if OSMs were  
189 observed, JS scores were used to evaluate organs for the specific expression for each  
190 OSM as previously described (Cabili *et al.*, 2011; Li *et al.*, 2015). Finally, each  $\tau$   
191 value was compared with the other JS scores (corresponding to each of the eight  
192 organs) for each miRNA. Organ specificity of miRNA expression and the respective  
193 expression-specific organs were successively confirmed.

194

### 195 **Determination and functional analysis of potential miRNA targets**

196 The potential target genes of OSMs were predicted using two bioinformatic tools. The  
197 first was RNAhybrid (Kruger et and Rehmsmeier, 2006 ), and the default parameters  
198 were used as follows: -b 100 -c -f 2,8 -m 100000 -v 3 -u 3 -e -20 -p 1 -s 3utr\_Bb. The

199 second tool used was miRanda (Betel et al., 2008), with the following default  
200 parameters of -en -20 -strict being used. The intersection point for the results from  
201 two prediction tools was assumed to be the set of reliably predicted target genes of the  
202 OSMs. These potential targets were selected for downstream analyses. To determine  
203 the functions of the predicted OSM regulated target genes, the genes were predicted  
204 target genes of all miRNAs identified in this study were annotated using a basic local  
205 BlastX tool (Kent, 2002), using the default parameters in the NCBI non-redundant  
206 (NR) animal database. To further understand the regulatory function of OSMs in  
207 different organs of *B. belcheri*, known OSM (analyzed based on *B. belcheri* miRNAs  
208 previously identified and stored at miRBase database) target genes predicted by  
209 bioinformatics were filtered and extracted according to the following criteria: 1) target  
210 genes with unknown annotation and hypothetical proteins were removed; and 2)  
211 multiple targets with the same gene description were filtered, with only one being  
212 retained as the representative. Next, GO annotation of each gene was extracted using  
213 Blast2GO pipeline (Conesa et al., 2005) according to the NR annotation. Because  
214 annotation of model animals is full, while that of non-model species is lack, thus  
215 sequences of *B. belcheri* were searched in libraries of all the animal species in the GO  
216 term analysis to obtain adequately best match. We performed the GO enrichment  
217 analysis for the predicted target genes of the OSMs using Fisher's exact test in  
218 Blast2GO pipeline (Conesa et al., 2005), and outputs (*P*-values) of the software were  
219 used to perform multiple test corrections by false discovery rate (FDR). GO terms  
220 presenting  $FDR < 0.05$  were retained. The redundant GO terms were then reduced

221 using the GO trimming tool (Koop et al., 2011). GO terms for biological processes  
222 were retained to represent the enriched functions of predicted target gene clusters.

223

## 224 **Quantitative real-time PCR**

225 Collection of the eight organs and extraction of their total RNA, including small  
226 RNAs, were performed according to the above-mentioned methods. For each organ  
227 type, three biological replications were used. Mature miRNA expression was  
228 measured using Taqman probe kits (Applied Biosystems, USA) customized for each  
229 gene, including the RT primers, PCR primers and Taqman probes. The product  
230 information for each miRNA probe is presented in [Supplementary File 1](#). We selected  
231 U6 as a housekeeping gene. Each reaction was conducted in three technical replicates.  
232 Relative expression levels of target miRNAs were normalized using the  $2^{-\Delta\Delta C_t}$  method  
233 (Livak and Schmittgen, 2001). The data shown are presented as the mean  $\pm$  SD and  
234 figures were generated by SigmaPlot 12.0. According to methods described in our  
235 previous studies (Zhang *et al.*, 2017b), consistency of miRNA expression patterns  
236 between deep sequencing and qRT-PCR were evaluated by calculating the Pearson's  
237 correlation coefficient and its significance (*p*-value) level in IBM SPSS statistics 22  
238 software.

239

## 240 **RESULTS**

### 241 **Overall assessment of the miRNAome of different organs**

242 Approximately 34 million clean reads for each of the eight organ samples, including

243 skin, ovary, notochord, nerve cord, muscle, intestine, hepatic caecum, and gill, were  
244 obtained after filtering low-quality reads and contaminants (**Figure 1A, B, C and**  
245 **Supplementary File 2**). All of the organ samples showed peak length of the miRNAs  
246 at about 22-23nt (**Supplementary File 3**), as has been previously described for *B.*  
247 *belcheri* and other animals (Zhang *et al.*, 2017a). All sequencing data have been  
248 released to the NCBI SRA database under accession number  
249 SRR9951226-SRR9951233. The ratios of total clean tags that mapped to the *B.*  
250 *belcheri* genome ranged from 74.61% to 82.23%, indicating that a set of reliable clean  
251 tags was obtained (Zhang *et al.*, 2017a). To minimize false positive signals, only tags  
252 with Transcripts Per Million (TPM) values  $\geq 5$  were retained for further bioinformatic  
253 analysis. Based on the annotated results of sRNA, it is found that miRNAs occupied a  
254 high proportion of sRNA tags in *B. belcheri* organs investigated in this study ( $> 50\%$ ,  
255 **Supplementary File 4**), indicating that miRNA molecules were adequately enriched.

256

### 257 **Identification of known, conserved and potential novel miRNAs in *B. belcheri***

258 A total of 167 known miRNAs, distributed amongst 82 miRNA families, were  
259 expressed in at least one organ type (**Table 1**). In miRBase21.0, 173 mature  
260 bbe-miRNA sequences have been stored, and approximately 97% of these were  
261 identified in the current study. Of these previously annotated miRNAs, approximately  
262 93% are expressed in the nerve cord. Moreover, 138 known miRNAs were identified  
263 to be homologous with those of *B. floridae*, 39 of which are homologous to  
264 microRNAs in vertebrates (**Supplementary File 5**). Together, this indicates that these

265 39 vertebrate miRNAs have evolved in ancient chordates. However, and 99 of the  
266 known miRNAs have only been detected in amphioxus.

267 A total of 23 potential novel miRNAs were shared (expressed in all eight organs)  
268 ([Supplementary File 6](#)) across all organs sequenced in this study. These were analyzed  
269 further for the detection of the organ expression specificity and specifically expressed  
270 organs by calculating their respective  $\tau$  and then JS scores, respectively. Predicted  
271 precursor structure of these novel miRNAs is presented in ([Supplementary File 7](#)).  
272 Furthermore, novel\_mir1 was detected, and is conserved with bfl-miR-4871-3p of *B.*  
273 *floridae* (Jin *et al.*, 2017; Zhang *et al.*, 2017a). Homologs of the remaining novel  
274 miRNAs were not detected, indicating that these miRNAs may potentially be  
275 lineage-specific in *B. belcheri*. Alternatively, these remaining novel miRNAs may be  
276 existed in other species but haven't been detected yet.

277

## 278 **Identification and functional enrichment analysis of OSMs**

279 Of all *B. belcheri* miRNAs identified here, 79 OSMs (41.58%) showed organ-specific  
280 expression ( $\tau > 0.85$ ) ([Supplementary File 8](#)). Furthermore, the distribution tendency  
281 of maximal JS scores is presented in **Figure 2**. Among them, 68 OSMs were observed  
282 to be conserved with those of *B. floridae* as well as other vertebrates, accounting for  
283 86.08% of all OSMs ([Supplementary File 8](#)). Among the 8 organs, the nerve cord  
284 sample showed the highest number of OSMs (26), followed by the gill (20), the  
285 hepatic caecum (11), the muscle (8), and the skin (7). The ovary (3), the notochord (2)  
286 and the intestine (2) had the lowest numbers of OSMs (**Figure 3A**). All OSMs are

287 listed in **Supplementary File 8**, including known and novel OSMs. The known OSMs  
288 are also presented in **Figure 3B**.

289 The comprehensive miRNA catalog allows us to explore the potential functions  
290 of the miRNAs observed in *B. belchrei*. Here, 22,117 potential targeted genes were  
291 identified using both the RNAhybrid and miRanda software programs (**Figure 3C**).  
292 Using GO enrichment analysis, the putative target genes of the OSMs in each organ  
293 were to be enriched using the GO terms belonging to the “Biological Process”  
294 subcategory (**Supplementary File 9**). In the skin, 12 enriched GO terms were primarily  
295 related to response to stimulus and epidermis development. These terms also included  
296 “apoptotic process”, “response to UV-B”, “response to mechanical stimulus”, and  
297 “epidermis development”. For the ovary, the 5 GO terms obtained were  
298 overrepresented and associated with signaling processes, immune response and ovary  
299 development, which included “signaling”, “defense response”, and “gonad  
300 development. Unsurprisingly, GO terms enriched from predicted target genes of  
301 muscle OSMs were primarily involved in muscle development and morphogenesis.  
302 The intestine, hepatic caecum, and gill are considered to be digestive and immune  
303 tissues of amphioxus (Han *et al.*, 2010; Liu *et al.*, 2009). In these three organs, many  
304 GO terms involving immune and stimulus response, apoptosis, immune system,  
305 metabolic and catabolic processes were widely enriched. Notably, the GO term  
306 “proteolysis” was specifically exhibited in the intestine. Meanwhile, it was observed  
307 that OSMs of the hepatic caecum also specifically regulated target genes related to  
308 stimulus and organic metabolism. In the nerve cord, OSMs were primarily associated

309 with stimulus and drug response, circadian rhythm, sensory behavior, and neural  
310 development and function. The GO terms enriched by predicted targets of notochord  
311 OSMs were related to cell process and function, phosphorylation and development  
312 process.

313

#### 314 **Analysis of predicted target genes of known OSMs**

315 Known OSM target genes predicted by bioinformatics were listed (**Supplementary**  
316 **File 10**). We found that some typical genes involved in stimulus response could be  
317 regulated by specific expression of several known OSMs in the skin, such as heat  
318 shock protein 70 (*HSP70*) and genes encoding nod-like receptors (NLR protein),  
319 mitogen-activated protein kinase 3 (*MAP4K3*), mucin-2-like (*MUC2L*) and tumor  
320 necrosis factor receptor superfamily member 11A (*TNFRSF11A*), toll-like receptor 4  
321 (*TLR4*) and collagen alpha-1 (XII) chain (*COL12A1*). Additionally, genes related to  
322 calmodulin regulation were found as predicted targets of skin OSMs, including  
323 calmodulin-related protein 3 (*CALREP3*), calcium-activated potassium channel  
324 subunit alpha-1 (*KCNMA1*), and calcium/calmodulin-dependent protein kinase type II  
325 subunit gamma (*CAMK2G*).

326 In the ovary, bbe-miR-2068-5p was predicted to regulate lipid metabolism  
327 function, reactive oxygen species and gene encoding piwi-like 1 protein (*PIWILI*),  
328 while bbe-miR-4873-5p participated probably in the regulation of genes involving  
329 stimulus and immune responses, such as mitogen-activated protein kinase kinase  
330 kinase15 (*MAP3K15*), WD repeat-containing protein 26 (*WDR26*), and ubiquitin-like



331 modifier-activating enzyme 6 (*UBA6*).

332 In the notochord, it is found that genes potentially related to notochord  
333 development were regulated by known OSMs, including insulin-like growth factors 1  
334 (*IGF1*), bone morphogenetic protein 3 (*BMP3*), notochord homeobox-like protein,  
335 muscle, and skeletal receptor tyrosine-protein kinase (*MUSK*).

336 In the nerve cord, various innate immune-related genes were found to be putative  
337 targets of OSMs, including complement (*Clq1*, complement factor H (*CFH*),  
338 complement component factor B/C2 (*B/C2*)), pattern recognition receptors (PRRs)  
339 (NLR protein, RIG-I-like receptor LGP2), cytokines (interferon regulatory factor 2, 4,  
340 5 (*IRF2*, 4,5)), adaptors and signal transducers (TNF receptor-associated factor 6  
341 (*TRAF6*), and WD repeat-containing protein 6-like protein). Some typical genes  
342 associated with nerve development and function were also found, such as fibroblast  
343 growth factor receptor (*FGFR2*), neurogenic locus protein delta-like protein,  
344 neurogenic locus notch-like protein 3 (*NOTCH3*), paired box protein Pax-6 (*PAX6*),  
345 *AMPHIHOX4*, *PAX3/7*, neurotrophic tyrosine kinase receptor precursor (*NTKR*),  
346 *NOTCH1L* and *NOTCH2*. Notably, OSMs regulated putative target genes encoding  
347 proteins involved invertebrate brain function and nerve disease, visual sensing in the  
348 nerve cord, including adult brain protein 239-like, huntingtin and opsin protein.

349 In the muscle, OSM predicted targets related to ubiquitination are  
350 overrepresented, including E3 ubiquitin-protein ligase family (*E3 ubiquitin-protein*  
351 *ligase HUWE1-like*, *E3 ubiquitin-protein ligase CBL-like*, *E3 ubiquitin-protein ligase*  
352 *MARCH6* and *E3 ubiquitin-protein ligase MURF2*) and ubiquitin conjugation factor

353 E4 B (*UBE4B*). In the intestine, hepatic caecum and gill, a large number of genes  
354 involved in the innate immune system are regulated by OSMs, including HSPs,  
355 complement component, PRRs, cytokines, apoptosis-related proteins, adaptors, signal  
356 transducers and caspases; particularly, mucin-2 (*MUC2*), a major mucin of the colon  
357 mucus in the vertebrates, frequently appeared to be potentially regulated targets of  
358 OSMs in the intestine and hepatic caecum. Interestingly, in the list of predicted target  
359 genes of OSMs in the hepatic caecum, we noted some insulin-related genes, such as  
360 insulin-degrading enzyme (*IDE*), insulin-like growth factor and insulin-like growth  
361 factor 1 receptor (*IGF1R*).

362

### 363 **Validation of miRNA expression profiles using qRT-PCR**

364 To further validate the expression of the identified miRNAs by deep sequencing, the  
365 expression patterns of eight randomly selected known miRNAs across different  
366 organs, were investigated using Taqman miRNA probes. Linear correlation analyses  
367 of the fold-changes in the relative expression levels between the miRNA sequencing  
368 and quantitative real-time PCR (qRT-PCR) results showed a significant correlation for  
369 each miRNA (Pearson's correlation coefficients  $> 0.8$ ,  $P < 0.05$ ) (**Figure 3D**).

370

## 371 **DISCUSSION**

372 In this study, approximately 34 million clean reads across eight organ of *B. belcheri*  
373 were generated, which is the largest so far obtained for sRNAs of *B. belcheri*,  
374 allowing us to obtain adequate miRNA molecules that are contained in different

375 organs. Additionally, the miRNA expression levels quantified by qRT-PCR analysis of  
376 eight randomly selected known miRNAs indicated that deep sequencing is reliable,  
377 which provided a quality guarantee for downstream bioinformatics analysis. A total of  
378 190 miRNAs (167 known) were detected in the current study. Zhou *et al.* (2017)  
379 performed systematic investigation of *B. floridae* microRNAs using a computational  
380 pipeline to predict miRNAs from throughout the genome. The authors identified 245  
381 predicted miRNAs, which is more than the present study. The higher number of  
382 predicted miRNAs can be attributed to false positives resulting from only using a  
383 bioinformatic genome scan under a regular threshold. More importantly, miRNAs  
384 identified in the current study can indeed be expressed in organs of adult amphioxus.  
385 However, a proportion of those detected by genome-wide bioinformatic scan may not  
386 be expressed or only expressed at low levels in adult animals under normal conditions.  
387 Some examples could be those miRNAs involved in development, immunology, and  
388 response to stress. In addition, a higher proportion ( $79/190 = 41.58\%$ ) of miRNAs  
389 were predicted to be expressed in an organ-specific manner. By contrast, a previously  
390 published study reported that only 47/245 (19.18%) were development-specific  
391 miRNAs (Zhou *et al.*, 2017). This could be the result of different algorithms being  
392 used to detect specific miRNAs. Alternatively, organ function formation depend on  
393 more specific miRNA than developmental processes in amphioxus.

394 The vast majority of the conserved miRNAs detected here have already known  
395 been annotated (only novel\_mir1 was a newly detected miRNA). Previous studies  
396 showed that an average transcripts per million (TPM used for quantification of

397 expression level) values of the top 30 known miRNA identified in *B. belcheri*  
398 averaged 2272.4. By contrast, TPM values of the top 30 novel miRNAs was only is  
399 131.1 (Zhang *et al.*, 2017a). The conserved miRNAs present higher expression levels  
400 than *B. belcheri*-specific miRNAs, and they were detected as known miRNAs more  
401 easily, because of higher abundance of known miRNAs than that of novel miRNAs in  
402 amphioxus. Furthermore, the majority of the OSMs detected here were found to be  
403 conserved with *B. floridae* and other vertebrates. This suggests that amphioxus OSMs  
404 play a key role in organ function formation in amphioxus speciation, and contributing  
405 to the complexity of the vertebrate body. Interestingly, conserved functions of the  
406 miR-1/miR-133 cluster in chordate muscle differentiation have been proposed, and  
407 their specific location was preliminarily assessed by *in situ* hybridization using  
408 amphioxus embryos (early, early-mid, and late neurulae) and early larvae  
409 (Campo-Paysaa *et al.*, 2011). In the current study, muscle-specific expression of all  
410 miR-1 and miR-133 OSMs (e.g. bbe-miR-133-5p, bbe-miR-133-3p and bbe-miR-1-5p)  
411 was observed. These observations lend additional support to the hypothesized role of  
412 miR-1 and miR-133 in amphioxus muscle differentiation. Moreover, *in situ*  
413 hybridization of miR-1 and miR-133 produced spatial expression data similar to that  
414 obtained through miRNA sequencing. This demonstrated the reliability of the  
415 analyses conducted in this study. The conserved novel\_mir1 identified in this study is  
416 homologous to bfl-miR-4871-3p. However, the function of the miR-4871 family  
417 remains elusive. Analysis of predicted target genes showed that this conserved OSM  
418 regulates genes encoding fibroblast growth factor receptors (FGFRs) that promote the

419 proliferation and differentiation of various cells via binding cell surface-expressed  
420 receptor tyrosine kinases (Han *et al.*, 2017). Therefore, the novel\_mir1 may contribute  
421 to skin function formation in amphioxus, although further research is needed for  
422 confirmation.

423 The data presented here suggests show that some OSM target genes enriched in  
424 certain GO terms are limited to organ-specific functions. Those involving epidermis  
425 development and regulation of epithelial cell proliferation were detected in the skin.  
426 In the ovary, GO terms with organ-specific functions are related to gonad  
427 development. Muscle -specific GO terms in the muscle are primarily associated with  
428 muscle cell and organ development, which is consistent with data obtained using  
429 porcine and human skeletal muscle (Baccouche *et al.*, 2014; Martini *et al.*, 2014).  
430 Taken together, the data suggests that OSM regulatory functions in amphioxus muscle  
431 are conserved in vertebrates. For those OSMs in the intestine, their predicted target  
432 genes are also enriched to organ-specific GO terms related to the proteolysis.  
433 Proteolysis is the breakdown of proteins into shorter peptides and amino acids to aid  
434 in the digestion of food in the intestine (Aloğlu *et al.*, 2011). Therefore, proteolysis  
435 would be expected to be a key intestine-specific function among various amphioxus  
436 organs. It was also observed that some hepatic caecum -specific GO terms, such as  
437 those involving organic metabolism are functions that have also been associated with  
438 the liver in other vertebrate species (Araújo *et al.*, 2018). A large number of nerve  
439 cord-specific GO terms involving nervous system-related functions and development  
440 were represented, indicating that the nervous system of amphioxus is unexpectedly

441 functionally complex with diverse function, as previously described (Benito-Gutiérrez,  
442 2006). Interestingly, some biological processes managed by the vertebrate brain are  
443 exhibited specifically, such as circadian rhythm, learning, sleep, light response and  
444 vision. Previous publications have proposed that the anterior of the amphioxus  
445 cerebral vesicle (neurula) is homologous to the thalamus, pretectum (as part of  
446 diencephalon that is part of the forebrain in vertebrates) and midbrain of vertebrates  
447 based on the expression pattern of developmental protein-coding genes (such *HOX*,  
448 *OTX*, *DLX*, etc.) (Holland and Holland, 1998; Albuixech-Crespo *et al.*, 2017). Here,  
449 the analysis supports findings that the vertebrate brain originates from part of the  
450 ancestral nerve cord based on the perspective of miRNA expression. In the gill and  
451 notochord, GO terms involving a wide range of biological functions are  
452 overrepresented. Particularly, innate immune-related GO terms, such as those  
453 involving cell apoptosis, immune system, and defense response were widely  
454 distributed, especially in the intestine, gill, and hepatic caecum. This wide organ  
455 distribution of immune-related GO terms may be explained by the fact that these  
456 tissues are on constant contact with seawater, which is the source of most microbial  
457 exposures.

458       The bbe-miR-182 family was detected as known OSMs in the amphioxus skin.  
459 As reported in previous studies, miR-182 expressed at specific levels in the skin is  
460 associated with breast cancer and basal cell carcinoma (Sand *et al.*, 2012; Wang *et al.*,  
461 2013), suggesting that miR-182 is an ancient miRNA family of skin-specific  
462 regulators. Furthermore, it was predicted that a miR-182 may be a key regulator of

463 innate immune- and calmodulin-related genes, thus miR-182 may be a potential  
464 molecular indicator of immune system activities in the research of skin immunity of  
465 amphioxus. At the time of publication, no reports on the function of miR-2068 and  
466 miR-4873 families could be found. Here, it was observed that, in the ovary, it was  
467 predicted that the OSMs miR-2068 and miR-4873 regulate *PIWILI*, which belongs to  
468 the piRNA pathway (Rengaraj *et al.*, 2014). These observations suggest potential  
469 regulatory function of miRNAs to piRNA and the ovary immune system in amphioxus.  
470 Despite notochord-specific GO terms are not being found, some genes involved in  
471 notochord development were predicted in the target gene analysis. These OSMs may  
472 be candidates for investigation of notochord evo-devo. It was observed that not only  
473 known OSMs that potentially target genes involving vertebrate brain function, as well  
474 as development and diseases of the nerve system were predicted, but also those that  
475 regulate typically innate immune-related genes. For example, Liu *et al.* (2016)  
476 demonstrated that amphioxus LGP2, a target of bbe-miR-4928-3p as OSMs, plays an  
477 antiviral role similar to that observed in other vertebrate species by comparing  
478 expression in *Branchiostoma japonicum* challenged with viral mimic poly(I:C) and  
479 untreated controls. These results provide evidence that neuro immunity is active and  
480 that miRNAs may be mediators of the neuro-immune system in early branching  
481 chordates. In the review by Candiani *et al.* (2012), the role of mir9, mir124, mir219 in  
482 deuterostomes were possibly associated with evolution of a central nervous system  
483 (CNS). In support of the above review, nerve cord-specific expression of these three  
484 miRNA families were observed in this study. Target genes of mir9, mir124, and

485 mir219 were predicted using bioinformatics. In addition, several known and novel  
486 miRNAs with nerve cord-specific expression were newly identified in the current  
487 investigations. These data serve as a foundational genetic resource to support future  
488 exploration of CNS evolution in chordates. In the muscle, known OSMs (e.g.  
489 bbe-miR-1-5p, bbe-miR-133-3p, bbe-miR-2058-5p and bbe-miR-4859-3p) are  
490 primarily involved in ubiquitination. The E3 ubiquitin ligases could function in  
491 ubiquitin-mediated muscle protein turnover, promoting skeletal muscle differentiation  
492 and myofibrillogenesis (Perera *et al.*, 2012). Furthermore, miR-133 and miR-1 were  
493 found to be muscle-specific miRNAs conserved in vertebrates (Tani *et al.*, 2013). The  
494 data presented here show muscle-specific expression of these two miRNA families,  
495 revealing their conservation in chordates, not just in higher vertebrates. Many studies  
496 have discussed the key roles of the intestine, gill, and hepatic caecum as the most  
497 important immune organs in the defense against various insults in amphioxus,  
498 including miRNA, organ structure, and protein-coding genes (Han *et al.*, 2010). Here,  
499 OSMs involved in immune function in these three organs were identified, suggesting  
500 that the immune system may be active and regulated by miRNAs in multiple organs  
501 of amphioxus. Notably, insulin-related enzyme and growth factor (*IDE*, *IGF1*,  
502 *IGFIR*), as predicted targets of OSMs in the hepatic caecum, are well known for  
503 playing specific key roles in the pancreatic cells of vertebrates (Zhang *et al.*, 2007;  
504 Fernández-Díaz *et al.*, 2018). Therefore, in later branching chordates, it is reasonable  
505 to speculate that the ancestral homologous organs of vertebrate pancreas probably  
506 have functional connection to a certain extent with the hepatic caecum.



507 In summary, the identification and quantification of miRNA in different organs is  
508 a first key step in the investigation of their associated functions in amphioxus. Deep  
509 sequencing was employed to detect and quantify miRNAs in eight organs.  
510 Bioinformatic analysis was used to detect OSMs based on these miRNAs. Many of  
511 the miRNAs identified here had not been previously reported. Of note, due to a  
512 largely unknown and complex miRNA functions, the regulatory roles of several  
513 OSMs in this study could not be concluded. This is the first study to explore the  
514 dynamics of miRNAs in multiple organs at a genome-wide level using deep  
515 sequencing in amphioxus. Our analysis contributes to the field's understanding of the  
516 differentiation of organ function in amphioxus.

517

## 518 **COMPLETING INTERESTS**

519 The authors declare no competing financial interests.

520

## 521 **ACKNOWLEDGMENTS**

522 This study was supported by the foundation of Guangxi Key Laboratory of Beibu  
523 Gulf Marine Biodiversity Conservation, Beibu Gulf University (No: 2019KA01 and  
524 2019ZB09), and the Scientific Research Foundation Project of Yunnan Education  
525 Department (2019J0050), and Natural Science Foundation of Guangxi Province (No:  
526 2016GXNSFBA380156, 2016GXNSFCA380007), and the National Natural Science  
527 Foundation of China (No: 31760713).

528

## 529 **REFERENCES**

- 530 Albuixech-Crespo, B., López-Blanch, L., Burguera, D., Maeso, I., Sánchez-Arrones, L.,  
531 Moreno-Bravo, J.A., et al. (2017). Molecular regionalization of the developing amphioxus  
532 neural tube challenges major partitions of the vertebrate brain. *PLoS Biol.* 15, e2001573. doi:  
533 10.1371/journal.pbio.2001573
- 534 Aloglu, H.Ş., Z, Ouml, and ner (2011). Determination of antioxidant activity of bioactive peptide  
535 fractions obtained from yogurt. *J. Dairy Sci.* 94, 5305. doi: 10.3168/jds.2011-4285
- 536 Araújo, B.C., Wade, N.M., De, P.M., Rodriguesfilho, J.A., Garcia, C., De, M.C., et al. (2018).  
537 Characterization of lipid metabolism genes and the influence of fatty acid supplementation in  
538 the hepatic lipid metabolism of dusky grouper (*Epinephelus marginatus*). *Comp. Biochem.*  
539 *Physiol. Part A Mol. Int. Physiol.* 219-220. doi: 10.1016/j.cbpa.2018.01.018
- 540 Arner, P., and Kulyté, A. (2015). MicroRNA regulatory networks in human adipose tissue and  
541 obesity. *Nat. Rev. Endocrinol.* 11, 276-288. doi: 10.1038/nrendo.2015.25
- 542 Baccouche, H., Maunz, M., Beck, T., Fogarassy, P., and Beyer, M. (2014). Genome-wide survey of  
543 tissue-specific microRNA and transcription factor regulatory networks in 12 tissues. *Sci. Rep.*  
544 4, 5150. doi: 10.1038/srep05150
- 545 Benito-Gutiérrez E. (2006). A gene catalogue of the amphioxus nervous system. *Int. J. Biol. Sci.* 2:  
546 149-160. doi: 10.7150/ijbs.2.149
- 547 Betel D., Wilson M., Gabow A., Marks D.S., and Sander C. (2008). The microRNA.org resource:  
548 targets and expression. *Nucleic Acids Res.* 36 (Database issue): D149-D153. doi:  
549 10.1093/nar/gkm995
- 550 Cabili, M.N., Trapnell, C., Goff, L., Koziol, M., Tazonvega, B., Regev, A., et al. (2011).  
551 Integrative annotation of human large intergenic noncoding RNAs reveals global properties  
552 and specific subclasses. *Gene Dev.* 25, 1915-1927. doi: 10.1101/gad.17446611
- 553 Campo-Paysaa, F., Sémon, M., Cameron, R.A., Peterson, K.J., and Schubert, M. (2011).  
554 microRNA complements in deuterostomes: origin and evolution of microRNAs. *Evo. Dev.* 13,  
555 15–27. doi: 10.1111/j.1525-142X.2010.00452.x
- 556 Candiani, S., Moronti, L., Tonelli, D.D.P., Garbarino, G., and Pestarino, M. (2011). A study of  
557 neural-related microRNAs in the developing amphioxus. *Evo. Dev.* 2, 1-18. doi:  
558 10.1186/2041-9139-2-15
- 559 Candiani, S. (2012). Focus on miRNAs evolution: a perspective from amphioxus. *Brief Funct.*

- 560        *Genomics* 1, 107-117. doi: 10.1093/bfgp/els004
- 561    Chen, J.Y., Huang, D.Y., and Li, C.W. (1999). An early Cambrian craniate-like chordate. *Nature*  
562        402, 518-522. doi: <https://doi.org/10.1038/990080>
- 563    Conesa, A., Götz, S., García-Gómez, J.M., Terol, J., Talón, M., and Robles, M. (2005). Blast2GO:  
564        a universal tool for annotation, visualization and analysis in functional genomics research.  
565        *Bioinformatics* 21, 3674-3676. doi: 10.1093/bioinformatics/bti610
- 566    Fernández-Díaz, C.M., Escobar-Curbelo, L., López-Acosta, J.F., Lobatón, C.D., Moreno, A.,  
567        Sanz-Ortega, J., et al. (2018). Insulin degrading enzyme is up-regulated in pancreatic  $\beta$ cells by  
568        insulin treatment. *Histol. Histopathol.* 11997. doi: 10.14670/HH-11-997
- 569    Friedländer, M.R., Chen, W., Adamidi, C., Maaskola, J., Einspanier, R., Knespel, S., et al. (2008).  
570        Discovering microRNAs from deep sequencing data using miRDeep. *Nat. Biotechnol.* 26,  
571        407-415. doi: 10.1038/nbt1394
- 572    Friedländer, M.R., Mackowiak, S.D., Li, N., Chen, W., and Rajewsky, N. (2012). miRDeep2  
573        accurately identifies known and hundreds of novel microRNA genes in seven animal clades.  
574        *Nucleic Acids Res.* 40, 37-52. doi: 10.1093/nar/gkr688
- 575    Gao, Y., Schug, J., McKenna, L.B., Le, L.J., Kaestner, K.H., and Greenbaum, L.E. (2011).  
576        Tissue-specific regulation of mouse MicroRNA genes in endoderm-derived tissues. *Nucleic*  
577        *Acids Res.* 39, 454-463. doi: 10.1093/nar/gkq782
- 578    Griffiths-Jones, S. (2006). miRBase: The microRNA sequence database. *Methods Mol. Biol.*  
579        342:129-138. doi: 10.1385/1-59745-123-1:129
- 580    Han, P., Guerrerometro, H., Estienne, A., Cao, B., and Price, C. (2017). Regulation and action of  
581        early growth response 1 in bovine granulosa cells. *Reproduction* 154, 547-557. doi:  
582        10.1530/REP-17-0243
- 583    Han, Y., Huang, G., Zhang, Q., Yuan, S., Liu, J., Zheng, T., et al. (2010). The primitive immune  
584        system of amphioxus provides insights into the ancestral structure of the vertebrate immune  
585        system. *Dev. Comp. Immunol.* 34, 791-796. doi: 10.1016/j.dci.2010.03.009
- 586    Holland, L.Z., and Holland, N.D. (1998). Developmental gene expression in amphioxus: new  
587        Insights into the evolutionary origin of vertebrate brain regions, neural crest, and rostrocaudal  
588        segmentation. *American Zool.* 38, 647-658. doi: 10.1093/icb/38.4.647
- 589    Holland, N.D., and Chen, J. (2001). Origin and early evolution of the vertebrates: new insights

- 590 from advances in molecular biology, anatomy, and palaeontology. *Bioessays* 23, 142–151. doi:  
591 10.1002/1521-1878(200102)23
- 592 Höner zu Siederdisen, C., Bernhart, S.H., Stadler, P.F., and Hofacker, I.L. (2011). A folding  
593 algorithm for extended rna secondary structures. *Bioinformatics*, 27, i129-i136. doi:  
594 10.1093/bioinformatics/btr220
- 595 Huang, S., Chen, Z., Yan, X., Yu, T., Huang, G., Yan, Q., et al. (2014). Decelerated genome  
596 evolution in modern vertebrates revealed by analysis of multiple lancelet genomes. *Nat.*  
597 *Commun.* 5, 5896-5896. doi: 10.1038/ncomms6896
- 598 Huang, Y., Ren, H., Xiong, J., Gao, X., and Sun, X. (2017). Identification and characterization of  
599 known and novel microRNAs in three tissues of Chinese giant salamander base on deep  
600 sequencing approach. *Genomics*, 109, 258-264. doi: 10.1016/j.ygeno.2017.04.007
- 601 Jin, P., Li, S., Sun, L., Lv, C., and Ma, F. (2017). Transcriptome-wide analysis of microRNAs in  
602 *Branchiostoma belcheri* upon *Vibrio parahemolyticus* infection. *Dev. Comp. Immunol.* 74,  
603 243-252. doi: <https://doi.org/10.1016/j.dci.2017.05.002>
- 604 Kent, W.J. (2002). BLAT-- the BLAST-like alignment tool. *Genome Res.* 12, 656-664. doi:  
605 10.1101/gr.229202
- 606 Koop, B.F., Minkley, D.R., Sutherland Ben, J.G., and Jantzen, S.G. (2011). GO Trimming:  
607 Systematically reducing redundancy in large gene ontology datasets. *BMC Res. Notes*, 4, 1-9.  
608 doi: 10.1186/1756-0500-4-267
- 609 Kruger, J., and Rehmsmeier, M. (2006). Rnahybrid: microrna target prediction easy, fast and  
610 flexible. *Nucleic Acids Res.* 34 (Web Server), W451-W454. doi: 10.1093/nar/gk1243
- 611 Langfelder, P., and Horvath, S. (2008). WGCNA: an R package for weighted correlation network  
612 analysis. *BMC Bioinformatics* 9, 559. doi: 10.1186/1471-2105-9-559
- 613 Langmead, B., Trapnell, C., Pop, M., and Salzberg, S.L. (2009). Ultrafast and memory-efficient  
614 alignment of short DNA sequences to the human genome. *Genome Biol.* 10, R25. doi:  
615 10.1186/gb-2009-10-3-r25
- 616 Li, F., Xiao, Y., Huang, F., Deng, W., Zhao, H., Shi, X., et al. (2015). Spatiotemporal-specific  
617 lncRNAs in the brain, colon, liver and lung of macaque during development. *Mol. Biosyst.* 11,  
618 3253-3263. doi: 10.1039/c5mb00474h
- 619 Liao, X., Yang, L., Chen, X., and Chen, J. (2017a). Identification of microRNA expression profiles

- 620 in the gill, intestine and hepatic caecum of *Branchiostoma belcheri*. *Protein Cell* 8, 302-307.  
621 doi: 10.1007/s13238-016-0365-3.
- 622 Liao, X., Yang, L., Zhang, Q., and Chen, J. (2017b). microRNA expression changes after  
623 lipopolysaccharide treatment in gills of amphioxus *Branchiostoma belcheri*. *Dev. Comp.*  
624 *Immunol.* 70, 39-44. doi: 10.1016/j.dci.2017.01.007.
- 625 Liu, S., Zhang, S., and Li, L. (2009). A transferrin-like homolog in amphioxus *Branchiostoma*  
626 *belcheri*: Identification, expression and functional characterization. *Mol. Immunol.* 46,  
627 3117-3124. doi: 10.1016/j.molimm.2009.06.001
- 628 Liu, S., Liu, Y., Yang, S., Huang, Y., Qin, Q., and Zhang, S. (2016). Evolutionary conservation of  
629 molecular structure and antiviral function of a viral receptor, LGP2, in amphioxus  
630 *Branchiostoma japonicum*. *Eur. J. Immunol.* 45, 3404-3416. doi: 10.1002/eji.201545860
- 631 Livak, K.J., and Schmittgen, T.D. (2001). Analysis of relative gene expression data using real-time  
632 quantitative PCR and the  $2^{-\Delta\Delta CT}$  method. *Methods* 25, 402-408. doi: 10.1006/meth.2001.1262
- 633 Marlétaz, F., Firbas, P.N., Maeso, I., Tena, J.J., Bogdanovic, O., Perry, M., et al. (2018).  
634 Amphioxus functional genomics and the origins of vertebrate gene regulation. *Nature* 564,  
635 64-70. doi: 10.1038/s41586-018-0734-6
- 636 Martini, P., Sales, G., Brugiolo, M., Gandaglia, A., Naso, F., Pittà, C.D., et al. (2014).  
637 Tissue-specific expression and regulatory networks of pig microRNAome. *PloS ONE* 9,  
638 e89755. doi: 10.1371/journal.pone.0089755
- 639 Perera, S., Mankoo, B., and Gautel, M. (2012). Developmental regulation of MURF E3 ubiquitin  
640 ligases in skeletal muscle. *J. Mus. Res. Cell Motility* 33, 107-122. doi:  
641 10.1007/s10974-012-9288-7
- 642 Putnam, N.H., Butts, T., Ferrier, D.E.K., Furlong, R.F., Hellsten, U., Kawashima, T., et al. (2008).  
643 The amphioxus genome and the evolution of the chordate karyotype. *Nature* 453, 1064-1071.  
644 doi: 10.1038/nature06967
- 645 Rengaraj, D., Lee, S.I., Park, T.S., Lee, H.J., Kim, Y.M., Sohn, Y.A., et al. (2014). Small  
646 non-coding RNA profiling and the role of piRNA pathway genes in the protection of chicken  
647 primordial germ cells. *BMC Genomics* 15, 757. doi: 10.1186/1471-2164-15-757
- 648 Sand, M., Skrygan, M., Sand, D., Georgas, D., Hahn, S.A., Gambichler, T., et al. (2012).  
649 Expression of microRNAs in basal cell carcinoma. *Brit. J. Dermatol.* 167, 847-855. doi:

- 650 10.1111/j.1365-2133.2012.11022.x
- 651 Satoh, N., Rokhsar, D., and Nishikawa, T. (2014). Chordate evolution and the three-phylum  
652 system. *Procd. Biol. Sci.* 281, 20141729. doi: 10.1098/rspb.2014.1729
- 653 Tani, S., Kuraku, S., Sakamoto, H., Inoue, K., and Kusakabe, R. (2013). Developmental  
654 expression and evolution of muscle-specific microRNAs conserved in vertebrates. *Evo. Dev.*  
655 15, 293-304. doi: 10.1111/ede.12039
- 656 Wang, P.Y., Gong, H.T., Bao-Feng, L.I., Chun-Lei, L.V., Wang, H.T., Zhou, H.H., et al. (2013).  
657 Higher expression of circulating miR-182 as a novel biomarker for breast cancer. *Oncol. Lett.*  
658 6, 1681-1686. doi: 10.3892/ol.2013.1593
- 659 Yanai, I., Benjamin, H., Shmoish, M., Chalifa-Caspi, V., Shklar, M., Ophir, R., et al. (2005).  
660 Genome-wide midrange transcription profiles reveal expression level relationships in human  
661 tissue specification. *Bioinformatics* 21, 650-659. doi: 10.1093/bioinformatics/bti042
- 662 Yang, R., Zheng, T., Cai, X., Yu, Y., Yu, C., Guo, L., et al. (2013). Genome-wide analyses of  
663 amphioxus microRNAs reveal an immune regulation via miR-92d targeting C3. *J. Immunol.*  
664 190, 1491-1500. doi: 10.4049/jimmunol.1200801
- 665 Yao, M.J., Chen, G., Zhao, P.P., Lu, M.H., Jian, J., Liu, M.F., et al. (2012). Transcriptome analysis  
666 of microRNAs in developing cerebral cortex of rat. *BMC Genomics* 13, 232. doi:  
667 10.1186/1471-2164-13-232
- 668 Yuan, C., Wang, X., Geng, R., He, X., Qu, L., and Chen, Y. (2013). Discovery of cashmere goat  
669 (*Capra hircus*) micornas in skin and hair follicles by solexa sequencing. *BMC Genomics*, 14,  
670 511. doi: 10.1186/1471-2164-14-511
- 671 Zhang, F., Sjöholm, Å., and Zhang, Q. (2007). Attenuation of insulin secretion by insulin-like  
672 growth factor binding protein-1 in pancreatic beta-cells. *Biochem. Biophy. Res. Commun.* 362,  
673 152-157. doi: 10.1016/j.bbrc.2007.07.160
- 674 Zhang, Q.L., Zhu, Q.H., Zhang, F., Xu, B., Wang, X.Q., and Chen, J.Y. (2017a).  
675 Transcriptome-wide analysis of immune-responsive microRNAs against poly (I:C) challenge  
676 in *Branchiostoma belcheri* by deep sequencing and bioinformatics. *Oncotarget* 8,  
677 73590-73602. doi: 10.1080/15476286.2017.1367890.
- 678 Zhang, Q.L., Zhu, Q.H., Xie, Z.Q., Xu, B., Wang, X.Q., and Chen, J.Y. (2017b). Genome-wide  
679 gene expression analysis of amphioxus (*Branchiostoma belcheri*) following

680 lipopolysaccharide challenge using strand-specific RNA-seq. *RNA Biology* 14, 1799-1809. doi:  
681 10.1080/15476286.2017.1367890  
682 Zhong, L., Zhang, F., Zhai, Y., Cao, Y., Zhang, S., and Chang, Y. (2015). Identification and  
683 comparative analysis of complement C3-associated microRNAs in immune response of  
684 *Apostichopus japonicus* by high-throughput sequencing. *Sci. Rep.* 5, 17763. doi:  
685 10.1038/srep17763

686 **Figure legends**

687 **Figure 1.** (A) Female adult amphioxus *Branchiostoma belcheri* (photographed by  
688 EOS 6D digital single-lens reflex cameras (Canon, Japan)). (B) An overview of body  
689 structure of adult *B. belcheri* (adapted from  
690 <http://faculty.baruch.cuny.edu/jwahlert/bio1003/chordata.html>). (C) Hematoxylin and  
691 eosin (H&E) staining on transverse sections of an adult *Branchiostoma belcheri*, with  
692 staining of nucleus purple and the cytoplasm pink.

693

694 **Figure 2.** Organ specificity of miRNAs. Distribution of maximal Jensen-Shannon (JS)  
695 specificity scores calculated for each organ-specific miRNA ( $\tau > 0.85$ ) across all eight  
696 organs.

697

698 **Figure 3.** (A) Number distribution of organ-specific miRNAs across eight organs. (B)  
699 The list of known organ-specific miRNAs in eight organs. (C) Number of predicted  
700 target genes of organ-specific miRNA using RNAhybrid and miRanda software. (D)  
701 Validation of expression of miRNAs by qRT-PCR experiment. Expression of eight  
702 selected randomly miRNAs was detected by qRT-PCR in *B. belcheri* organs including  
703 the skin, ovary, muscle, intestine, hepatic caecum, gill, nerve cord, and notochord.



704 **Table 1.** Statistics summary of miRNA in eight organs of *Branchiostoma belcheri*.

| <b>Organ types</b> | <b>Known miRNAs</b> | <b>Novel miRNAs</b> |
|--------------------|---------------------|---------------------|
| Nerve cord         | 160                 | 10                  |
| Notochord          | 147                 | 8                   |
| Skin               | 154                 | 8                   |
| Intestine          | 151                 | 8                   |
| Hepatic caecum     | 152                 | 12                  |
| Muscle             | 157                 | 12                  |
| Gill               | 155                 | 13                  |
| Ovary              | 138                 | 7                   |
| Total amount       | 167                 | 23                  |

705 **SUPPLEMENTARY MATERIAL**

706 **Supplementary File 1.** Taqman probe information of randomly selected miRNAs

707 used in qRT-PCR analysis.

708 **Supplementary File 2.** Summary of tags generated from sequencing of eight organs

709 small-RNA libraries in *Branchiostoma belcheri*.

710 **Supplementary File 3.** Length distribution of adult *Branchiostoma belcheri* small

711 RNA (sRNA) in each of eight organs. X axis is length and Y axis is number of clean

712 reads. Warmer color means shorter length of sRNA, while cooler color refer to longer.

713 **Supplementary File 4.** The stacking histogram for annotation of small RNAs in each

714 of eight organs. Exon and intron < 3% tags generated by the degradation of mRNAs.

715 **Supplementary File 5.** MicroRNAs homologous with those of vertebrates and

716 *Branchiostoma floridae* in adult *Branchiostoma belcheri*.

717 **Supplementary File 6.** List of novel miRNA and their precursors identified newly in

718 eight organs of adult *Branchiostoma belcheri*.

719 **Supplementary File 7.** Predicted precursor structure of all the novel miRNAs

720 identified in this study.

721 **Supplementary File 8.** List of organ-specific miRNAs identified in each organ of

722 adult *Branchiostoma belcheri*.

723 **Supplementary File 9.** List of the GO enrichment terms of targeted genes of

724 organ-specific miRNAs in each organ of adult *Branchiostoma belcheri*.

725 **Supplementary File 10.** The predicted targeted genes of organ-specific expressed

726 known miRNAs in each organ of adult *Branchiostoma belcheri*.

**A**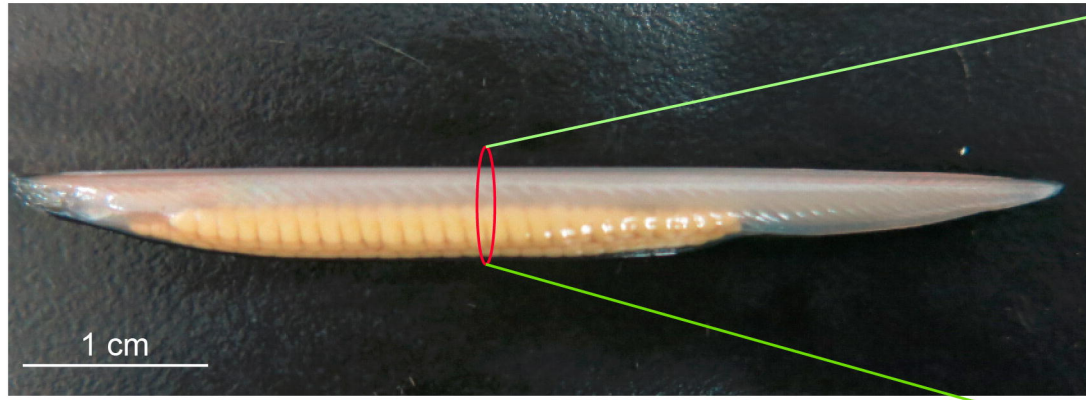**C**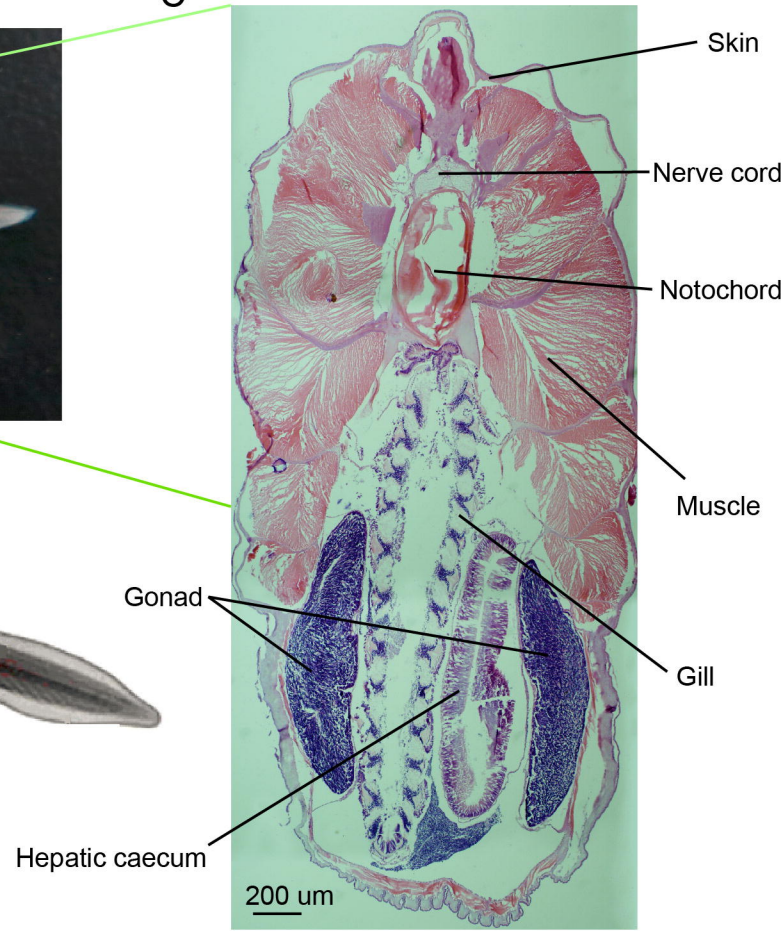**B**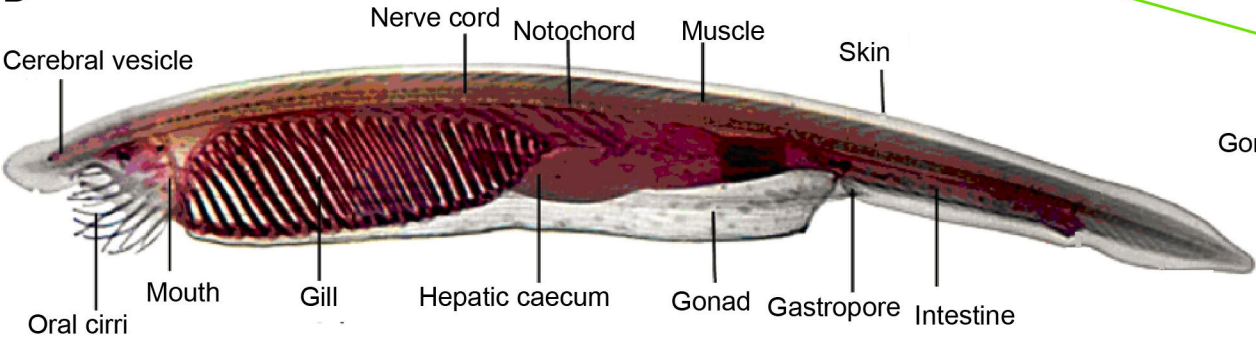

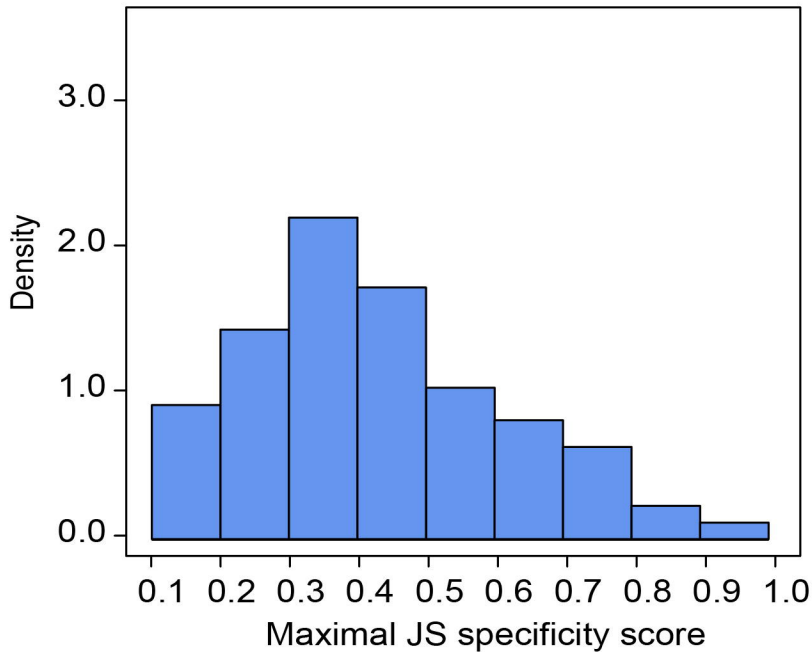

A

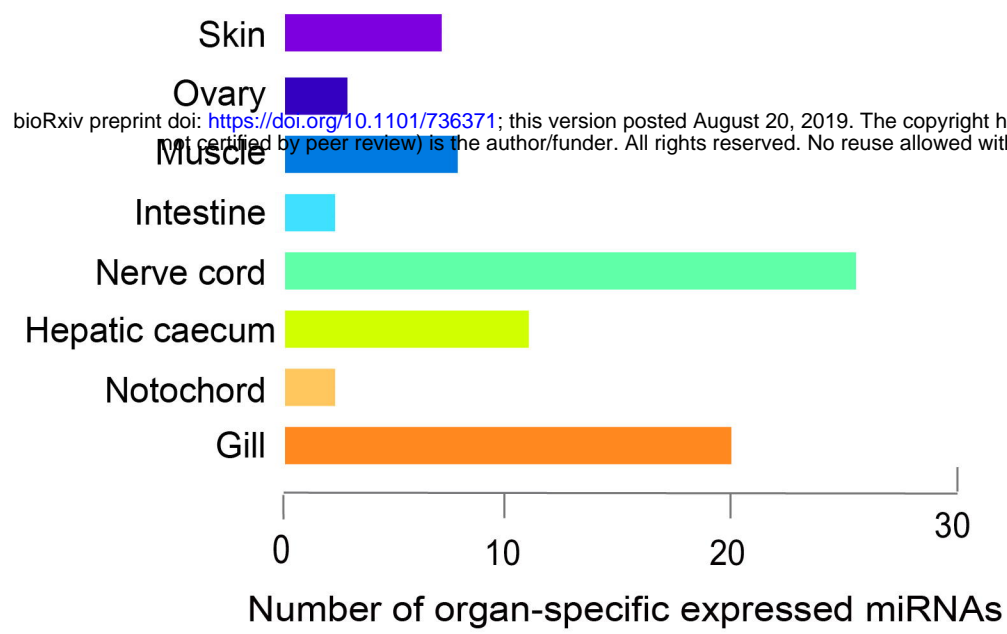

B

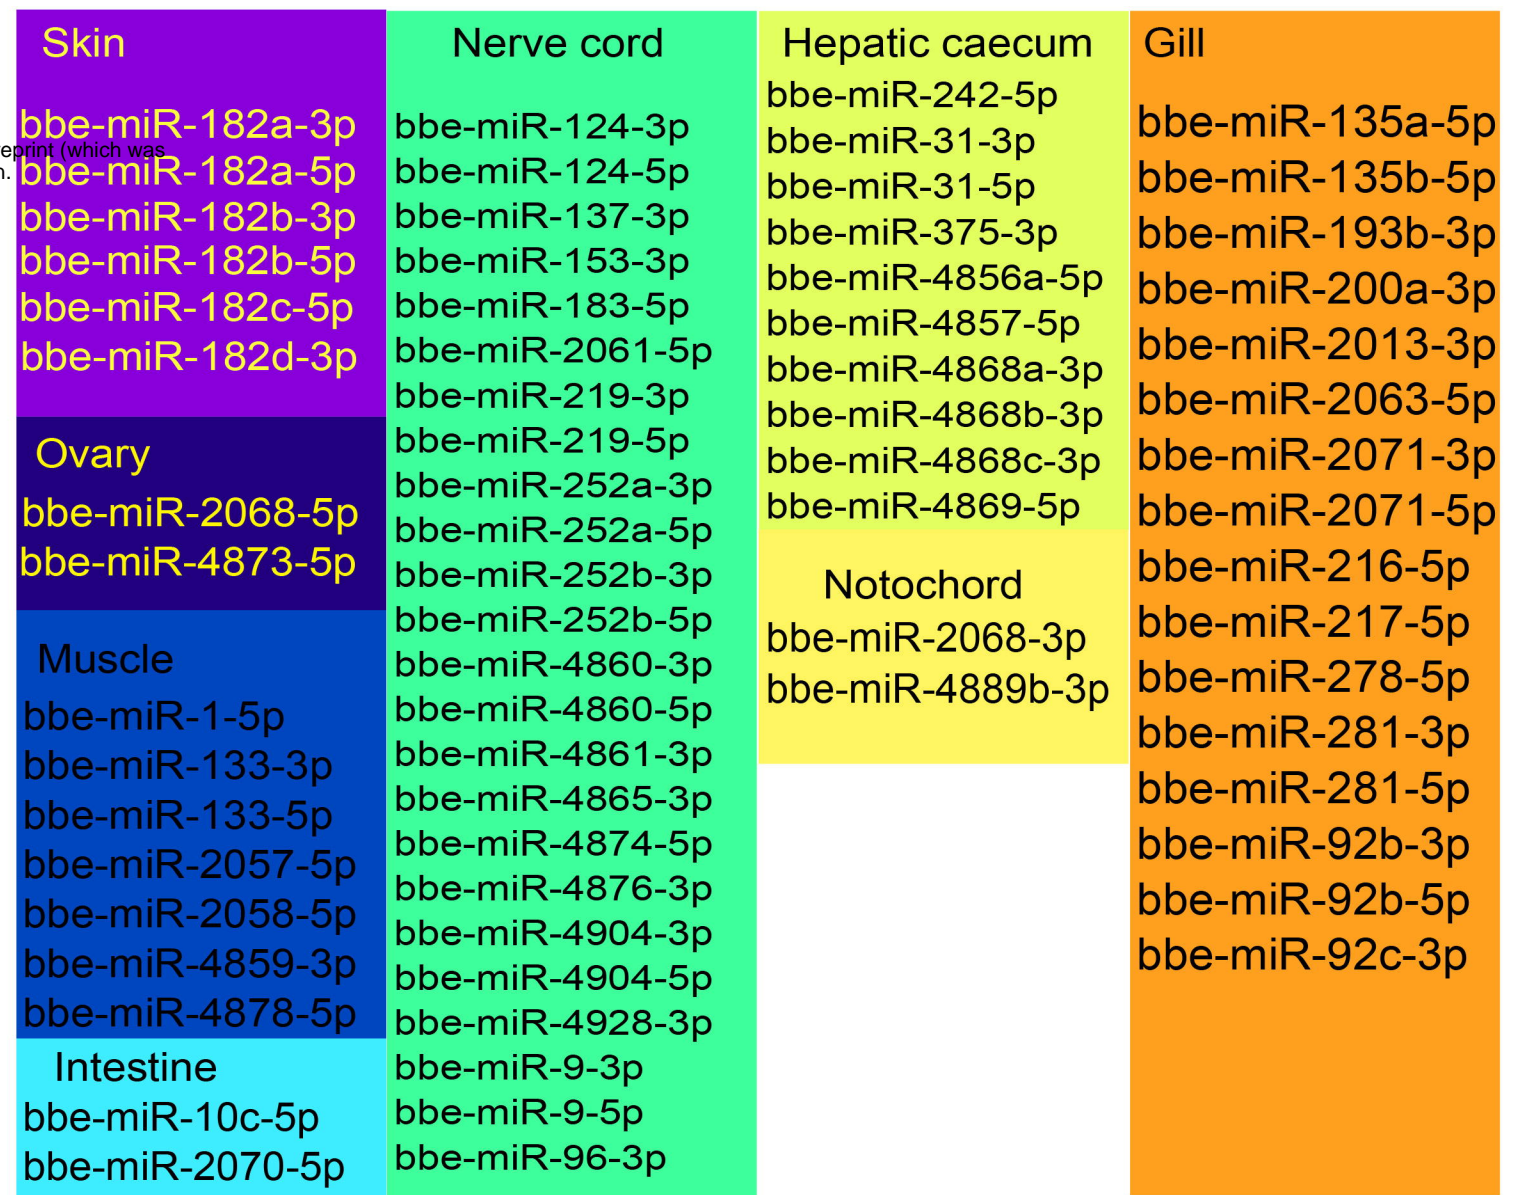

C

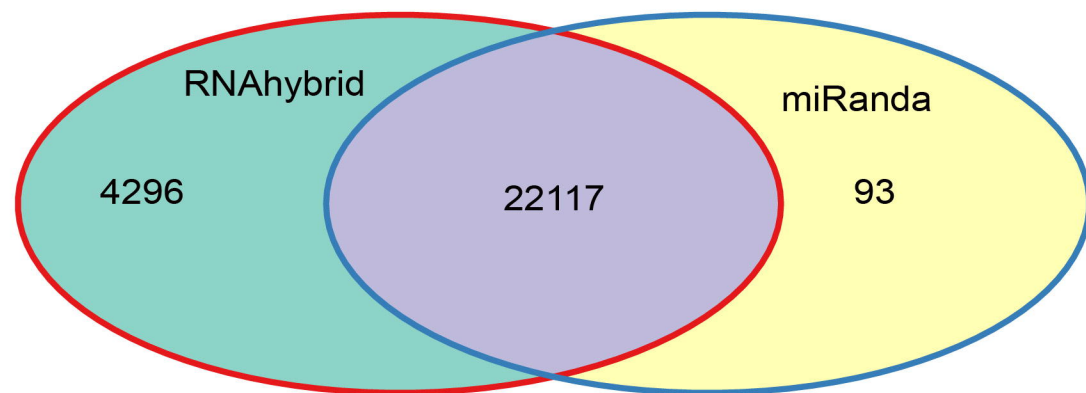

D

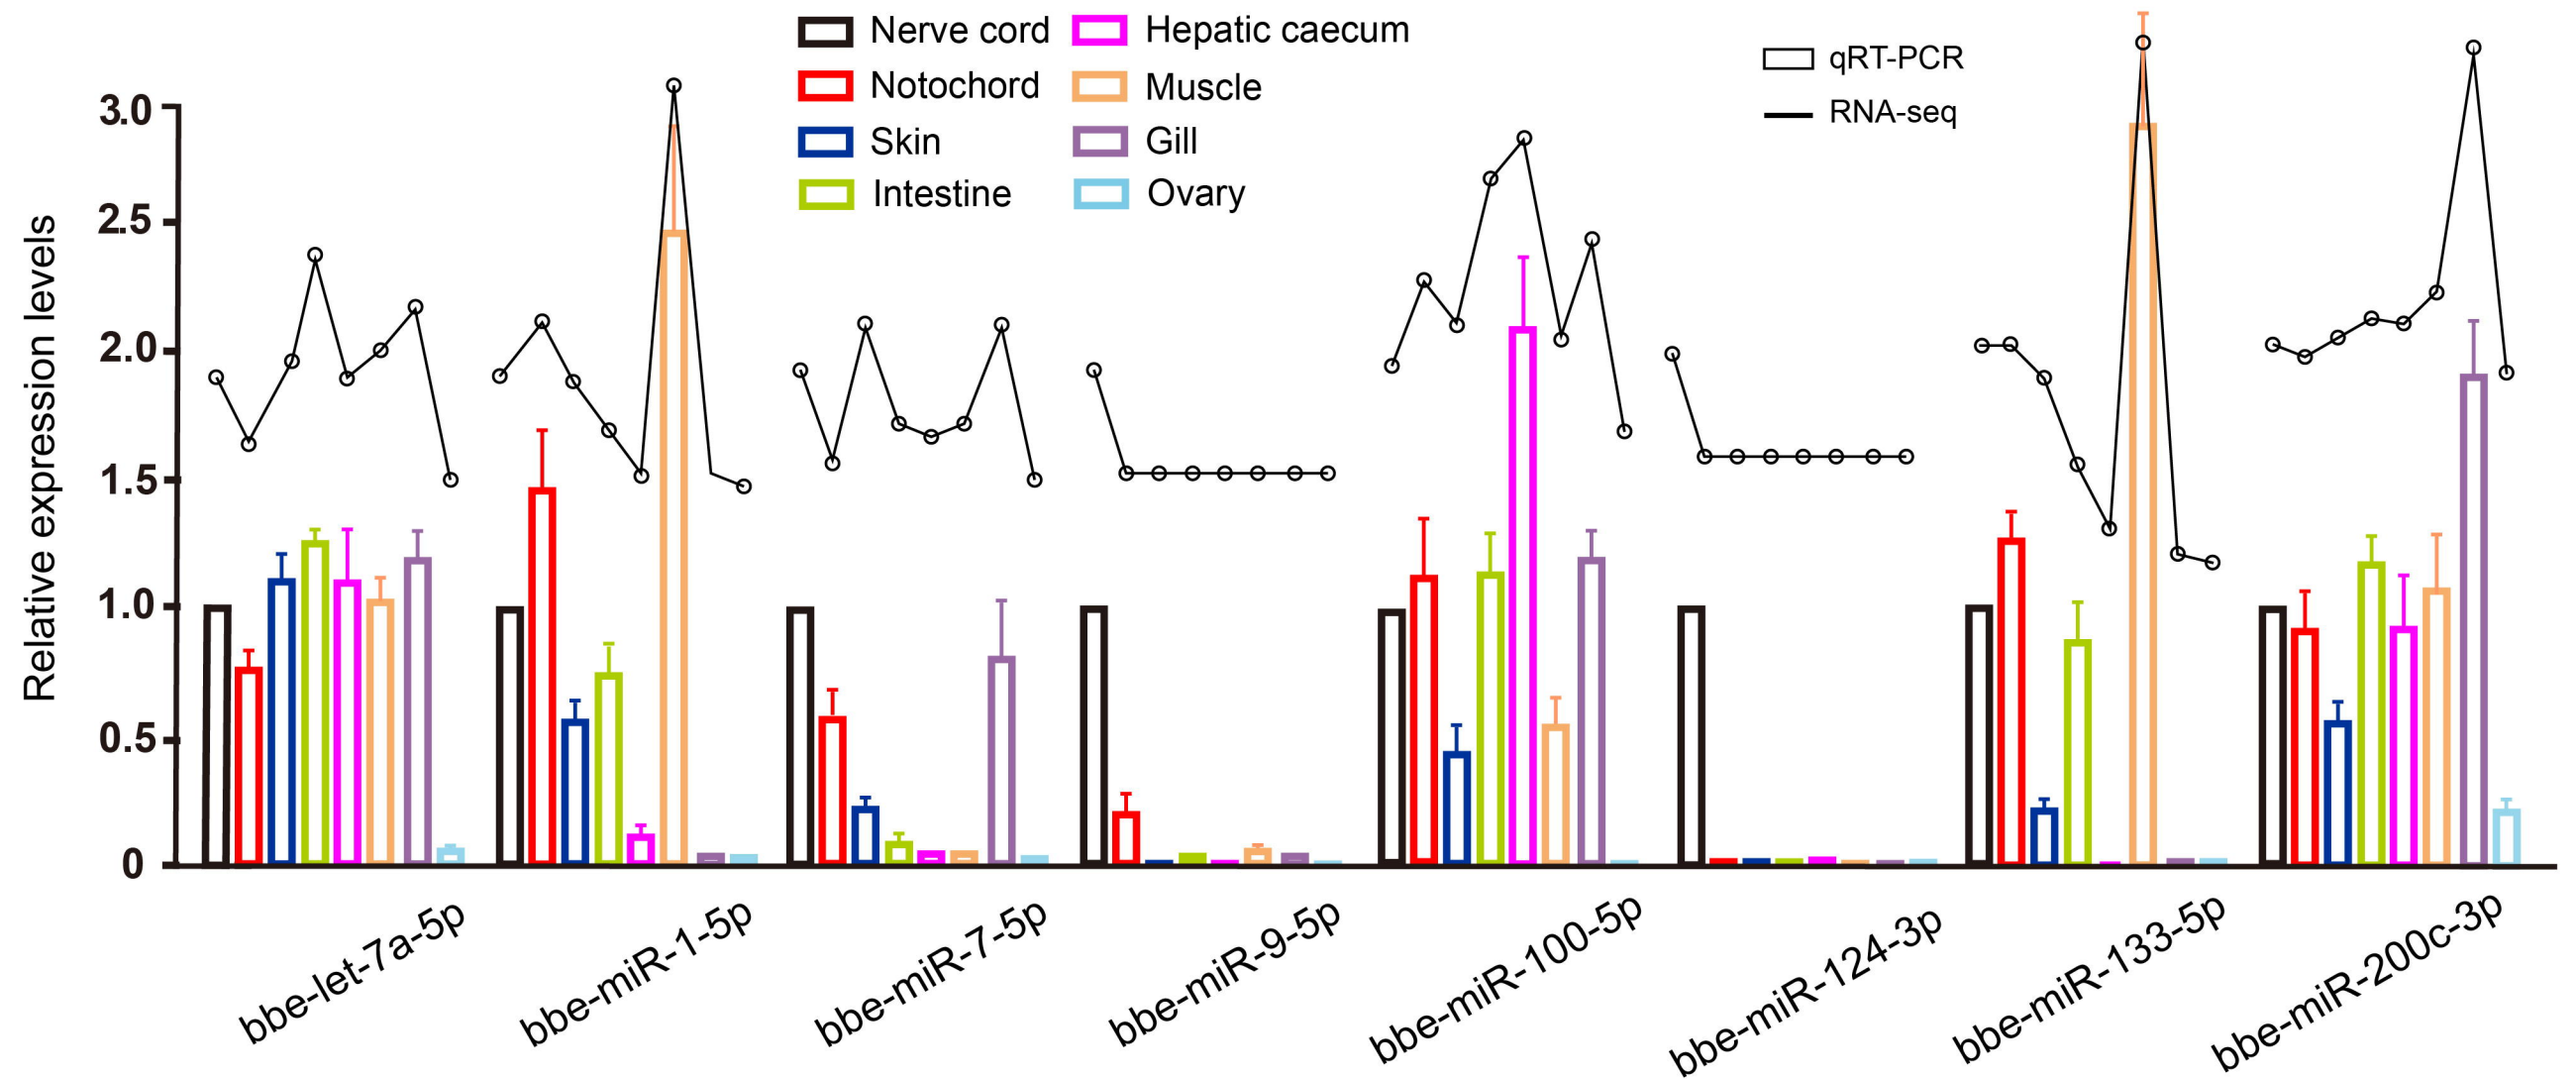

Source: https://biorxiv.org/content/biorxiv/early/2019/08/20/736371.full-text.pdf
